# Supplementary material
Source: PubMed Central journal article supplement (PMC4059358)
Supplement: NIHMS589279-supplement-01.pdf [file NIHMS589279-supplement-01.pdf]

## Supporting Information

## Crystallographic Characterization of the Nitric Oxide Derivative of R-State Human Hemoglobin

Jun Yi,<sup>\*a,b</sup> Alexei S. Soares,<sup>c</sup> and George B. Richter-Addo<sup>\*a</sup>

<sup>a</sup> Department of Chemistry and Biochemistry, University of Oklahoma, 101 Stephenson Parkway, Norman, Oklahoma. U.S.A., 73019. Email: grichteraddo@ou.edu

<sup>b</sup> Department of Biological Engineering, Nanjing University of Science and Technology, Nanjing, China 210094.

<sup>c</sup> Macromolecular Crystallography Research Resource, National Synchrotron Light Source, Brookhaven National Laboratory, Upton, NY 11973. USA

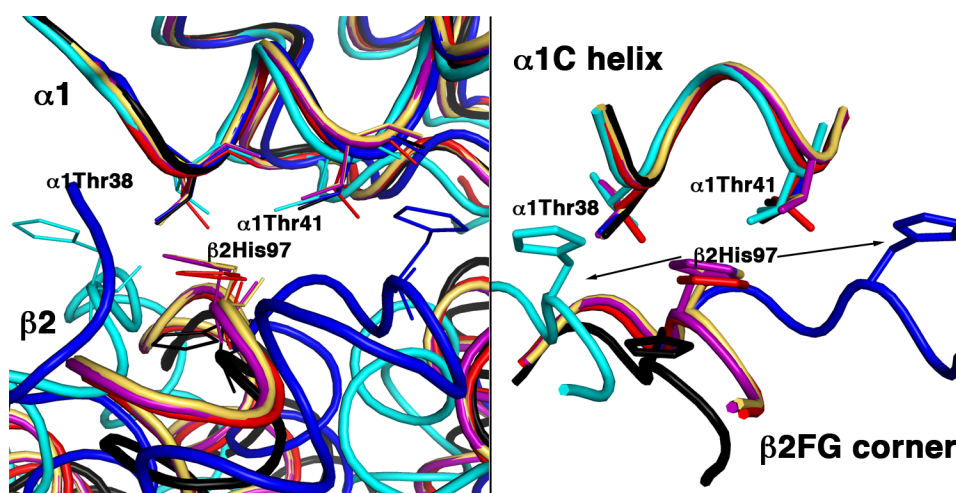

Figure S1. The  $\alpha 1\beta 2$  interface of representative Hb structures. **(left)** The  $\alpha 1\beta 1$  subunits were superimposed using a *T*-state deoxy Hb structure as the reference (PDB accession code: 1B86, 2.5 Å resolution; shown in blue) [1]. This generates the same positions of the  $\alpha 1$  C helices, but clearly shows different positions of the  $\beta 2$  FG corners for different quaternary structures. The *R*-state Hb(CO) (PDB accession code: 1AJ9, 2.2 Å resolution) is shown in red [2]; the *R2*-state Hb(CO) (PDB accession code: 1BBB, 1.7 Å resolution) is shown in black [3]; the *R3*-state Hb(CO) (PDB accession code: 1YZI, 2.07 Å resolution) is shown in cyan [4]; the aquometHb (PDB accession code: 3P5Q, 2.0 Å resolution) is shown in yellow [5]; and the Hb(NO) (PDB accession code: 4N8T, 1.9 Å resolution; this work) is shown in magenta. **(right)** Highlights of key residues ( $\alpha 1\text{Thr38}$ ,  $\alpha 1\text{Thr41}$  and  $\beta 2\text{His97}$ ) at this  $\alpha 1\beta 2$  interface. This analysis shows that the Hb(NO) and the aquometHb structures are in the *R* state.

References:

- [1] V. Richard, G.G. Dodson, Y. Manguen, Human Deoxyhaemoglobin-2,3-diphosphoglycerate Complex Low-Salt Structure at 2.5 Å Resolution, *J. Mol. Biol.* 233 (1993) 270-274.
- [2] G.B. Vasquez, X. Ji, C. Fronticelli, G.L. Gilliland, Human Carboxyhemoglobin at 2.2 Å Resolution: Structure and Solvent Comparisons of R-state, R2-state and T-state Hemoglobins, *Acta Cryst. D54* (1998) 355-366.
- [3] M.M. Silva, P.H. Rogers, A. Arnone, A Third Quaternary Structure of Human Hemoglobin A at 1.7 Å Resolution, *J. Biol. Chem.* 267 (1992) 17248-17256.
- [4] M.K. Safo, D.J. Abraham, The Enigma of the Liganded Hemoglobin End State: A Novel Quaternary Structure of Human Carbonmonoxy Hemoglobin, *Biochemistry* 44 (2005) 8347-8359.
- [5] J. Yi, L.M. Thomas, G.B. Richter-Addo, Crystal Structure of Human R-State Aquomethemoglobin at 2.0 Å Resolution, *Acta Cryst. F* 67 (2011) 647-651.
